# Supplementary material
Source: PubMed Central journal article supplement (PMC6177603)
Supplement: supp_RA118.003555_137567_2_supp_186079_pdk5vj.pdf [file supp_RA118.003555_137567_2_supp_186079_pdk5vj.pdf]

Figure S1

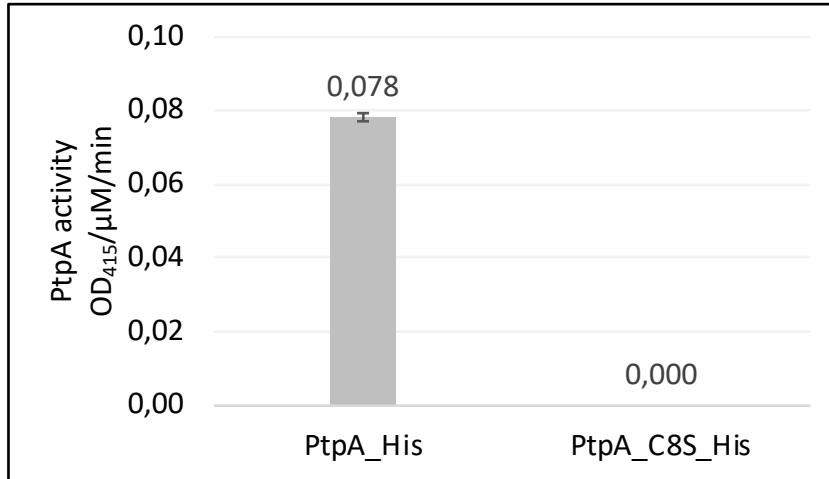

**Figure S1: Phosphatase activity of PtpA and derivatives.** PtpA<sub>His</sub> or PtpA<sub>C8S\_His</sub> were used to test their phosphatase activity by using *p*-nitrophenylphosphate (pNPP) as a substrate as previously described by Brelle *et al.* (2016). The assay was performed in triplicate. The PtpA<sub>C8S</sub> activity is null.

Brelle, S., Baronian, G., Huc-Brandt, S., Zaki, L. G., Cohen-Gonsaud, M., Bischoff, M., and Molle, V. (2016) Phosphorylation-mediated regulation of the *Staphylococcus aureus* secreted tyrosine phosphatase PtpA. *Biochem Biophys Res Commun* **469**, 619-625

# Figure S2

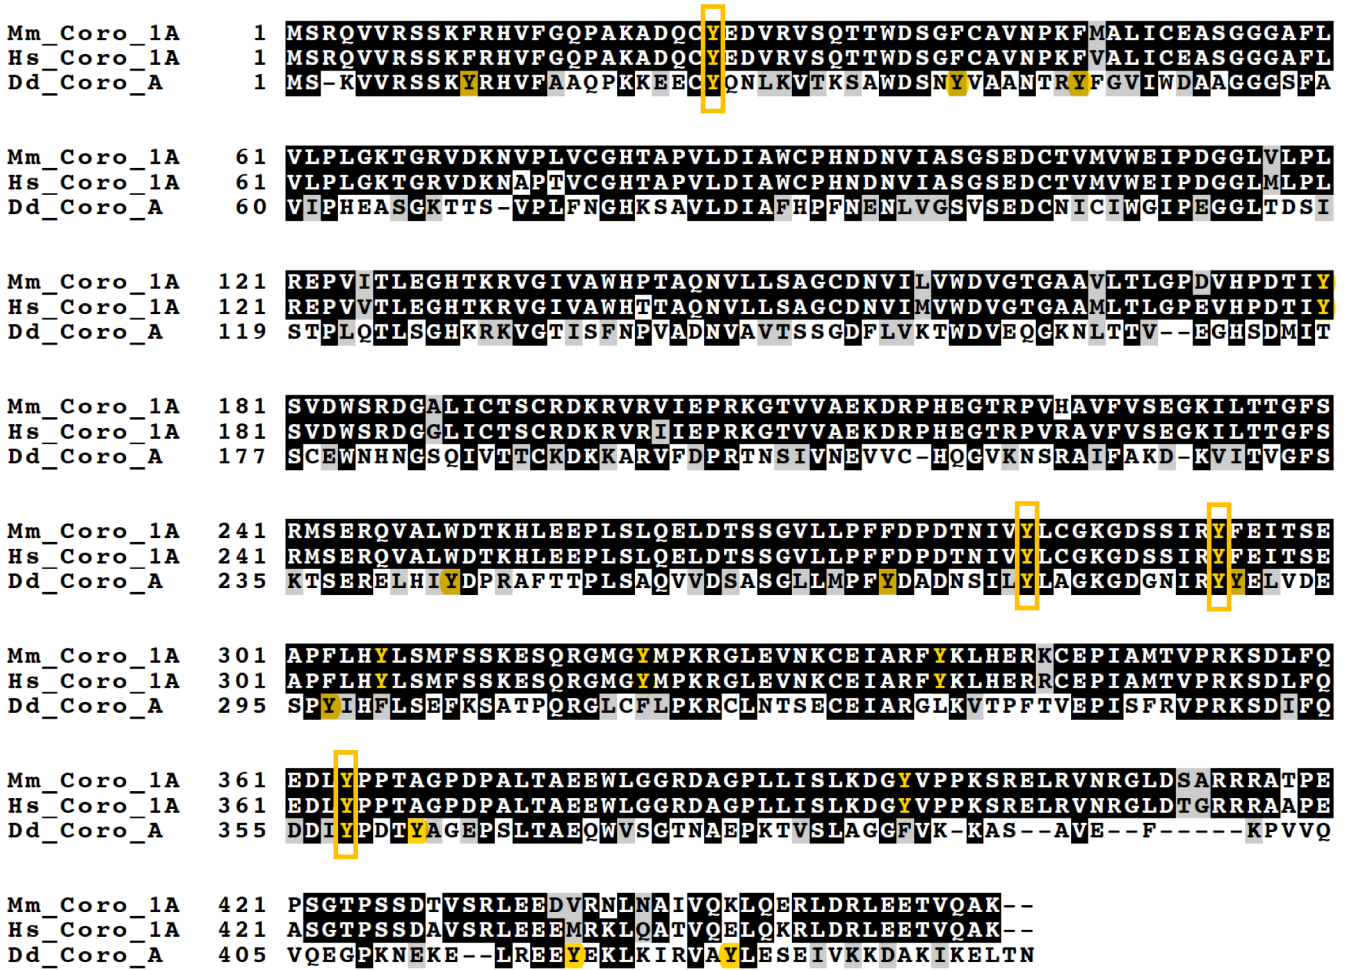

**Figure S2: Sequence alignment of Coronin 1A proteins.** Sequences were aligned using ClustalW program. Alignments are shaded using the BOXSHADE server. Sequence designations and NCBI GI numbers are as follows: Mm\_Coro-1A from Murine macrophages, GI O89053; Hs\_Coro-1A from Homo sapiens, GI P31146; and Dd\_Coro-A from *Dictyostelium discoideum*, GI P27133. Black boxes represent identical residues and grey boxes indicate similar residues. Tyrosine residue (Y) are highlighted in orange. Similar tyrosine residues in all three species are framed in orange boxes.

|                                 |                                                                 |     |
|---------------------------------|-----------------------------------------------------------------|-----|
| <i>Plasmodium falciparum</i>    | ----MYNVPLIKNLYPDPSS--NNLYGDLRCSRATETCGIACSAGYIAPVPQWVEGGGMIG   | 54  |
| <i>Toxoplasma gondii</i>        | -MADAVDVPLIKNLYABAW--KQOYSDLRRLSTKQTESCGLAANTEYIAPWDVGGGGVIG    | 57  |
| <i>Amphimedon queenslandica</i> | -MAFKQRHRSKFKHVKGPEFFKKNDCYDNVIKISKSPWDSNKSVDVNGKFLAVVLESQGGGAF | 59  |
| <i>Caenorhabditis elegans</i>   | -MAQIVRQSKFRHVFQKPKHESCSDIRVTEITWDSLDFCDVNPKFLAIFINRG--AGGPFM   | 58  |
| <i>Anopheles darlingi</i>       | MSFRVVRSSKFRHVYGGQALKREQCYDNIRVSKSSWDSTFCVAVNPKFLAIIIVESAGGGAFI | 60  |
| <i>Drosophila melanogaster</i>  | MSFRVVRSSKFRHVYGGQALKREQCYDNIRVSKSSWDSTFCVAVNPKFLAIIIVESAGGGAFI | 60  |
| <i>Nilaparvata lugens</i>       | MSFRVVRSSKFRHVYGGQALKREQCYDNIRVSKSSWDSTFCVAVNPKFLAIIIVESAGGGAFI | 60  |
| <i>Trichogramma pretiosum</i>   | MSFRVVRSSKFRHVYGGQALKREQCYDNIRVSKSSWDSTFCVAVNPKFLAIIIVESAGGGAFI | 60  |
| <i>Columba livia</i>            | -MRRVVRQSKFRHVFGQAVKNDQCYDDIRVSRVTWDSDFCAVNPRFVAIIVDASGGGAF     | 59  |
| <i>Gallus gallus</i>            | -MRRVVRQSKFRHVFGQAVKNDQCYDDIRVSRVTWDSDFCAVNPRFVAIIVDASGGGAF     | 59  |
| <i>Danio rerio</i>              | MSRKVVRSSKFRHVFGQAVKADQCYDDIRISQMTWDSNFCVSNPKFVSMIVDASGGGAFI    | 60  |
| <i>Salmo salar</i>              | MSRKVVRSSKFRHVFGQAVKADQCYDDIRISQMTWDSNFCVSNPKFVAMIVDASGGGAFI    | 60  |
| <i>Xenopus tropicalis</i>       | MSRKVVRSSKFRHVFGQAVKADQCYDDIRVSRVTWDSDFCAVNPRFVAIIVDASGGGAF     | 60  |
| <i>Ophiophagus hannah</i>       | MSRKVVRSSKFRHVYGGQAVKADQCYDDIRVSRVTWDSDFCAVNPRFVAIIVDASGGGAF    | 60  |
| <i>Python bivittatus</i>        | MSRKVVRSSKFRHVYGGQAVKADQCYDDIRVSRVTWDSDFCAVNPRFVAIIVDASGGGAF    | 60  |
| <i>Chrysemys picta bellii</i>   | MSRKVVRSSKFRHVFGQAVKADQCYDDIRISQMTWDSNFCVSNPKFVSMIVDASGGGAFI    | 60  |
| <i>Mus musculus</i>             | MSRQVVRSSKFRHVFGQAVKADQCYEDVRSVQTTWDSGFCVAVNPKFVALICEASGGGAF    | 60  |
| <i>Pteropus alecto</i>          | MSRQVVRSSKFRHVFGQAVKADQCYEDVRSVQTTWDSGFCVAVNPKFVALICEASGGGAF    | 60  |
| <i>Trichechus manatus</i>       | MSRQVVRSSKFRHVFGQAVKADQCYEDVRSVQTTWDSGFCVAVNPKFVALICEASGGGAF    | 60  |
| <i>Homo sapiens</i>             | MSRQVVRSSKFRHVFGQAVKADQCYEDVRSVQTTWDSGFCVAVNPKFVALICEASGGGAF    | 60  |
| <i>Macaca nemestrina</i>        | MSRQVVRSSKFRHVFGQAVKADQCYEDVRSVQTTWDSGFCVAVNPKFVALICEASGGGAF    | 60  |
| <i>Dictyostelium discoideum</i> | -MSKVVRSSKYRHVFAAQPKKEECYQNLKVTSAWDSNYVAANTRYFGVIWDAAGGGSFA     | 59  |
| <i>Entamoeba histolytica</i>    | MSYRFRITSKYRHVFGTEFKNDQQYNGTKMTNSAWDSNIIVCGYKHFSSMIWVAGGGGAF    | 60  |
| <i>Saccharomyces cerevisiae</i> | MSGKFRVRSKYRHVFGQAAKKEQYKELKVTNNAWDSNLLKTNKGFIAVNNWASGGGAF      | 60  |
| <i>Penicillium camemberti</i>   | MSGFRVRSKYRHVFGGRSTRKQDCYDNLVRSRNAWDTNLLKVTNPKHIAVNWASGGGAF     | 60  |
| <i>Plasmodium falciparum</i>    | TTS-PL-TTITLDNAASPLLPYIDETGMYIYLIGKGDGNCRYIYQYSQGS--IRKVDYK     | 305 |
| <i>Toxoplasma gondii</i>        | FDK-PV-YHAEIDRGSPLPHYFDETTGMLYVCGKGDSSCRYYQYHGTT--LRSDVAYRS     | 308 |
| <i>Amphimedon queenslandica</i> | LSS-SL-ATEFTLDNGSGTIFSFDEEDTKMVYFIGKGDGQMRYYEILDESPYQQLSMYQH    | 310 |
| <i>Caenorhabditis elegans</i>   | LST-PI-VEEELDTSNGVVPFYDEDSGLVYLVGKGDCAIRYYEVNNDAPYVHYINTYTT     | 307 |
| <i>Anopheles darlingi</i>       | LGD-PI-VMVELDTSNGVMFPLYDPDTNLIIYLCGKGDVIRYFEVTPPEQPFVHYINQFQT   | 340 |
| <i>Drosophila melanogaster</i>  | LNE-PI-VMVELDTSNGVMFPLYDADTNMIYLCGKGDVIRYFEVTPPEQPFVHYINQFQT    | 309 |
| <i>Nilaparvata lugens</i>       | LTE-PI-VMVELDTSNGVMFPLYDPDTNLVYLCGKGDVIRYFEITAEPLPFVHYINTFQT    | 309 |
| <i>Trichogramma pretiosum</i>   | LAE-PI-TMLEDTSNGVMFPLYDPDTNLVYLCGKGDVIRYFEITPEPPFVHYINTFQT      | 309 |
| <i>Columba livia</i>            | MEE-PI-ALHEMDTSSGVLLPFYDPDTNIIYLCGKGDSSIRYFEITDESPPYHYLNTFSS    | 310 |
| <i>Gallus gallus</i>            | MEE-PI-ALHEMDTSSGVLLPFYDPDTNIIYLCGKGDSSIRYFEITDESPPYHYLNTFSS    | 310 |
| <i>Danio rerio</i>              | FGE-PL-TLQELDTSSGVLLPFDPDTGIVYLCGKGDSSIRYFEVTDAPYVHYLSMYSS      | 311 |
| <i>Salmo salar</i>              | FGE-PL-TLQELDTSSGVLLPFDPDTGIVYLCGKGDSSIRYFEVTDAPYVHYLSMYSS      | 311 |
| <i>Xenopus tropicalis</i>       | LGE-PL-TLQELDTSSGVLLPFDPDTNVVYLCGKGDSSIRYFEVTDAPYVHYLSLYSS      | 310 |
| <i>Ophiophagus hannah</i>       | PEE-PL-TLQELDTSSGVLLPFYDPDTNVVYLTGKGDSSIRYFELTGEAPYVHYLSMFTS    | 312 |
| <i>Python bivittatus</i>        | PEE-PL-TLQELDTSSGVLLPFYDPDTNVVYLTGKGDSSIRYFELTGEAPYVHYLSMFTS    | 312 |
| <i>Chrysemys picta bellii</i>   | LEE-PM-NLQELDTSSGVLLPHYDPDTSMVYLCGKGDSSIRYFEVTPPEAPYLHFLSLFSS   | 311 |
| <i>Mus musculus</i>             | LEE-PL-SLQELDTSSGVLLPFDPDTNIVYLCGKGDSSIRYFEITSEAPFLHYLSMFTS     | 312 |
| <i>Pteropus alecto</i>          | LEE-PL-SLQELDTSSGVLLPFDPDTNIVYLCGKGDSSIRYFEITSEAPFLHYLSMFTS     | 312 |
| <i>Trichechus manatus</i>       | LEE-PL-SLQELDTSSGVLLPFDPDTNIVYLCGKGDSSIRYFEITSEAPFLHYLSMFTS     | 312 |
| <i>Homo sapiens</i>             | LEE-PL-SLQELDTSSGVLLPFDPDTNIVYLCGKGDSSIRYFEITSEAPFLHYLSMFTS     | 312 |
| <i>Macaca nemestrina</i>        | LEE-PL-SLQELDTSSGVLLPFDPDTNIVYLCGKGDSSIRYFEITSEAPFLHYLSMFTS     | 312 |
| <i>Dictyostelium discoideum</i> | FTT-PL-SAQVVDASGLLMPFYDADNSIYLAGKGDGNIRYELVDESPIYHFLSEFKS       | 306 |
| <i>Entamoeba histolytica</i>    | LES-PL-CRHTVDNQSGVLMFPYDPLDLSLLYLGKGDSSISYFEIYHKKPYFVSLNTFRG    | 309 |
| <i>Saccharomyces cerevisiae</i> | IEKGLDGGFYTVQSSGILMPFYDEGNKILYLVGKGDGNIRYEFQND--FLFELSEFQS      | 318 |
| <i>Penicillium camemberti</i>   | V-REPIINGFKTLDSISGVCMPFWDGDTNMLYLAGRGDGNIRYFELENK--FEFLSEHS     | 316 |
| <i>Plasmodium falciparum</i>    | CLPFRSFGFLPKRMCVYKCEIGRVYKNGNNTDIRPISFYVPRKNSSIFQEDLYPPIIMR     | 365 |
| <i>Toxoplasma gondii</i>        | SVPIKNFCFIPKLAVDQMAEIGRMLKQENGNVLQPISFIVPRKNQDVQADLYPPAPDV      | 368 |
| <i>Amphimedon queenslandica</i> | SLPQIGVCSMPKRFLDHKACEVMRFFKLNKGMVEPIQIMIVPRK-SGMFQEDIPPCYAG     | 369 |
| <i>Caenorhabditis elegans</i>   | NEPQRAVGFQSKRGMSSSEENIRIYKLTTKGVVDILQFVPRK-SDLFQEDLYPDTTRST     | 366 |
| <i>Anopheles darlingi</i>       | PDSQRAIGMMPKRGCDVSTCEVAFYRLLNNSGLCQVISMVTPRK-SELFQEDLYPDTLAD    | 399 |
| <i>Drosophila melanogaster</i>  | TEPQRGIGLMPKRGCDVSTCEVAFYRLLNNSGLCQVISMVTPRK-SDLFQEDLYPDTLAE    | 368 |
| <i>Nilaparvata lugens</i>       | PDPQRGIGMMPKRGCDVSSCEITRFYRLNNSGLCQVITMTVPRK-SELFQEDLYPDTLGD    | 368 |
| <i>Trichogramma pretiosum</i>   | PDPQRGIGMMPKRGCDVNSCEISRFRLLNNSGFCQVSMVTPRK-SELFQEDLYPDTAGD     | 368 |
| <i>Columba livia</i>            | KEPQRGMGFMPKRGLDVNKCEIARFFKLHE-RKCEPIIMTVPRK-SDLFQEDLYPDTAGP    | 368 |
| <i>Gallus gallus</i>            | KEPQRGMGFMPKRGLDVNKCEIARFFKLHE-RKCEPIIMTVPRK-SDLFQEDLYPDTAGP    | 368 |
| <i>Danio rerio</i>              | KESQKGMGYMPKRGLEVNKCEIARFYKLHE-RKCEPIVMTVPRK-SDLFQEDLYPNTVGP    | 369 |
| <i>Salmo salar</i>              | KESQKGMGYMPKRGLEVNKCEIARFYKLHE-RKCEPIVMTVPRK-SDLFQEDLYPDTMGP    | 369 |
| <i>Xenopus tropicalis</i>       | KESQKGMGYMPKRGLEVNKCEIARFYKLHE-RKCEPIIMTVPRK-SDLFQEDLYPDTVGP    | 368 |
| <i>Ophiophagus hannah</i>       | KESQKGMGYMPKRGLEVNKCEIARFYKLHE-RKCEPIAMTVPRK-SDLFQEDLYPDTAGP    | 370 |
| <i>Python bivittatus</i>        | KESQKGMGYMPKRGLEVNKCEIARFYKLHE-RKCEPIAMTVPRK-SDLFQEDLYPDTAGP    | 370 |
| <i>Chrysemys picta bellii</i>   | KESQKGMGYMPKRGLEVNKCEIARFYKLHE-RRCEPIAMTVPRK-SDLFQEDLYPDTAGP    | 369 |
| <i>Mus musculus</i>             | KESQKGMGYMPKRGLEVNKCEIARFYKLHE-RKCEPIAMTVPRK-SDLFQEDLYPDTAGP    | 370 |
| <i>Pteropus alecto</i>          | KESQKGMGYMPKRGLEVNKCEIARFYKLHE-RRCEPIAMTVPRK-SDLFQEDLYPDTAGP    | 370 |
| <i>Trichechus manatus</i>       | KESQKGMGYMPKRGLEVNKCEIARFYKLHE-RRCEPIAMTVPRK-SDLFQEDLYPDTAGP    | 370 |
| <i>Homo sapiens</i>             | KESQKGMGYMPKRGLEVNKCEIARFYKLHE-RRCEPIAMTVPRK-SDLFQEDLYPDTAGP    | 370 |
| <i>Macaca nemestrina</i>        | KESQKGMGYMPKRGLEVNKCEIARFYKLHE-RRCEPIAMTVPRK-SDLFQEDLYPDTAGP    | 370 |
| <i>Dictyostelium discoideum</i> | ATPQRGLCFLPKRCLNTSECEIARGLKVT-FTVEPIISFRVPRK-SDFQDDIYPTTYAG     | 364 |
| <i>Entamoeba histolytica</i>    | EKPQSGLVIPKRLCNTTICEITKFMKIVP-DGVVPIISFCVPRK-SEFFQDDIYPTTYAG    | 367 |
| <i>Saccharomyces cerevisiae</i> | TEAQRGFAVAPKRMVNVKENEVLKGFKTVDQRIEIPVSVFFVPRR-SEFFQDDIYPDAPSN   | 377 |
| <i>Penicillium camemberti</i>   | ADPQRGVAFMPKRGVNMHDNEVARAYKTVDNQYIEPVSVIVPRR-SETFQDDIYPTTYAG    | 375 |

**Figure S3: Sequence alignment of conserved tyrosine residues harboring regions of Coronin 1 proteins.**

Sequences were aligned using Clustal Omega. Conserved tyrosine residues are labeled in yellow, mismatches are indicated in red. Sequences corresponding to the ones depicted in Fig. S2 are labeled in blue. Sequences were obtained from the following NCBI entries: *Amphimedon queenslandica*, XP\_003382924; *Anopheles darlingi*, GI 568254291; *Caenorhabditis elegans*, GI 25150742; *Chrysemys picta bellii*, XP\_005290238; *Columba livia*, GI 1307741494; *Danio rerio*, GI 41055464; *Drosophila melanogaster*, GI 21685588; *Entamoeba histolytica*, GI 1033413111; *Gallus gallus*, GI 482661642; *Homo sapiens*, GI P31146; *Macaca nemestria*, GI 795657297; *Mus musculus*, GI O89053; *Nilaparvata lugens*, XP\_022202333; *Ophiophagus hannah*, GI 565307310; *Penicillium camemberti*, GI 902279349; *Plasmodium falciparum*, GI 2808641; *Pteropus alecto*, GI 586561765; *Python bivittatus*, GI 602635008; *Saccharomyces cerevisiae*, GI 151940945; *Salmo salar*, GI 223647640; *Toxoplasma gondii*, GI 53801426; *Trichechus manatus*, GI 471410223; *Trichogramma pretiosum*, XP\_014222528; *Xenopus tropicalis*, GI 54262238.
